# Supplementary material for: Remimazolam besylate for sedation of postoperative patients in intensive care units: a phase I, open label, dose-finding study
Source: PubMed Central journal article supplement — Chin Med J (Engl). 2022 Sep 28;135(17):2134–6. doi: 10.1097/CM9.0000000000002243 (PMC9746757; doi:10.1097/cm9.0000000000002243), 2022-09-28
Supplement: cm9-135-2134-s001.pdf [file cm9-135-2134-s001.pdf]

**Supplementary Table 1 : Baseline demographics and clinical characteristics of study population (N=36).**

| Variables                                    | Infusion dose of remimazolam besylate ( $\text{mg} \cdot \text{kg}^{-1} \cdot \text{h}^{-1}$ ) |                   |                   |
|----------------------------------------------|------------------------------------------------------------------------------------------------|-------------------|-------------------|
|                                              | 0.100<br>(n = 12)                                                                              | 0.125<br>(n = 12) | 0.150<br>(n = 12) |
| Male                                         | 7 (58.3)                                                                                       | 7 (58.3)          | 9 (75.0)          |
| Age, years                                   | 52.6 ± 13.5                                                                                    | 58.2 ± 11.7       | 55.1 ± 16.0       |
| Weight, kg                                   | 58.9 ± 8.2                                                                                     | 62.7 ± 8.9        | 62.9 ± 14.1       |
| APACHE II score                              | 7.3 ± 3.1                                                                                      | 8.6 ± 4.2         | 7.8 ± 3.4         |
| Duration of remimazolam besylate infusion, h | 10.8 ± 1.7                                                                                     | 11.4 ± 2.4        | 11.7 ± 1.8        |
| Duration of mechanical ventilation, h        | 14.5 [12.3, 19.8]                                                                              | 17.5 [13.0, 19.8] | 14.5 [13.0, 15.8] |
| ICU length of stay, h                        | 21.5 [15.3, 34.3]                                                                              | 19.5 [14.0, 22.0] | 18.5 [16.3, 23.5] |
| Medical history                              |                                                                                                |                   |                   |
| Hypertension                                 | 2 (16.7)                                                                                       | 5 (41.7)          | 3 (25.0)          |
| Coronary artery disease                      | 1 (8.3)                                                                                        | 2 (16.7)          | 2 (16.7)          |
| Valvular heart disease                       | 1 (8.3)                                                                                        | 1 (8.3)           | 1 (8.3)           |
| Arrhythmia                                   | 1 (8.3)                                                                                        | 2 (16.7)          | 1 (8.3)           |
| Diabetes mellitus                            | 0 (0.0)                                                                                        | 1 (8.3)           | 1 (8.3)           |
| COPD                                         | 0 (0.0)                                                                                        | 1 (8.3)           | 2 (16.7)          |
| Cerebrovascular disease                      | 0 (0.0)                                                                                        | 1 (8.3)           | 1 (8.3)           |
| Cancer                                       | 2 (16.7)                                                                                       | 1 (8.3)           | 5 (41.7)          |
| Autoimmune disease                           | 2 (16.7)                                                                                       | 1 (8.3)           | 0 (0.0)           |
| Liver dysfunction                            | 1 (8.3)                                                                                        | 1 (8.3)           | 0 (0.0)           |
| Surgical site                                |                                                                                                |                   |                   |
| Upper abdomen                                | 1 (8.3)                                                                                        | 0 (0.0)           | 1 (8.3)           |
| Lower abdomen                                | 4 (33.3)                                                                                       | 2 (16.7)          | 3 (25.0)          |
| Spine and extremity                          | 6 (50.0)                                                                                       | 7 (58.3)          | 7 (58.3)          |
| Urinary system                               | 1 (8.3)                                                                                        | 1 (8.3)           | 1 (8.3)           |
| Others                                       | 0 (0.0)                                                                                        | 2 (16.7)          | 0 (0.0)           |

Data are presented as mean ± standard deviation, median [interquartile range] or n (%). APACHE II: acute physiology and chronic health evaluation II; COPD: chronic obstructive pulmonary disease.

**Supplementary Table 2: Baseline laboratory tests and arterial blood gases of study population (N=36).**

| Variables                           | Normal range | Infusion dose of remimazolam besylate ( $\text{mg} \cdot \text{kg}^{-1} \cdot \text{h}^{-1}$ ) |                   |                   |
|-------------------------------------|--------------|------------------------------------------------------------------------------------------------|-------------------|-------------------|
|                                     |              | 0.100<br>(n = 12)                                                                              | 0.125<br>(n = 12) | 0.150<br>(n = 12) |
| <b>Laboratory tests</b>             |              |                                                                                                |                   |                   |
| Hemoglobin, g/L                     | 130 - 175    | 98.1 (22.5)                                                                                    | 103.3 (29.3)      | 103.6 (22.0)      |
| Leucocytes, $\times 10^9$ /L        | 3.5 - 9.5    | 10.1 (3.0)                                                                                     | 9.7 (5.0)         | 10.5 (4.0)        |
| Platelets, $\times 10^9$ /L         | 125 - 350    | 180.8 (76.4)                                                                                   | 193.5 (101.1)     | 228.9 (118.3)     |
| Alanine aminotransferase, U/L       | 21 - 72      | 32.5 [21.3, 89.5]                                                                              | 29.0 [22.8, 36.5] | 32.0 [24.0, 73.5] |
| Total bilirubin, $\mu\text{mol/L}$  | 3 - 22       | 16.2 [11.9, 20.6]                                                                              | 8.4 [6.6, 12.1]   | 16.1 [11.3, 18.8] |
| Serum creatinine, $\mu\text{mol/L}$ | 58 - 110     | 48.5 (18.2)                                                                                    | 64.2 (14.4)       | 59.2 (17.8)       |
| Prothrombin time, s                 | 11 - 16      | 15.4 (1.3)                                                                                     | 14.9 (1.3)        | 15.1 (1.0)        |
| APTT, s                             | 28.0 - 43.5  | 39.4 (5.1)                                                                                     | 38.5 (6.1)        | 38.3 (3.4)        |
| Fibrinogen, g/L                     | 2.0 - 4.0    | 3.5 (1.3)                                                                                      | 3.2 (1.8)         | 3.1 (1.4)         |
| Creatine kinase MB, ng/mL           | <6.6         | 2.6 [1.4, 9.4]                                                                                 | 1.7 [1.0, 2.3]    | 5.1 [1.4, 9.2]    |
| Hypersensitive troponin I, ng/L     | <26.2        | 4.6 [2.4, 9.9]                                                                                 | 2.6 [1.7, 7.5]    | 8.5 [4.0, 13.3]   |
| <b>Arterial blood gases</b>         |              |                                                                                                |                   |                   |
| PH                                  | 7.35 - 7.45  | 7.40 (0.07)                                                                                    | 7.39 (0.07)       | 7.35 (0.06)       |
| PaO <sub>2</sub> /FiO <sub>2</sub>  | 400 - 500    | 307 [283, 443]                                                                                 | 353 [203, 513]    | 322 [290, 378]    |
| PaCO <sub>2</sub> , mm Hg           | 35 - 45      | 38.6 (8.2)                                                                                     | 40.5 (8.6)        | 41.3 (7.0)        |
| Lactate, mmol/L                     | 0.5 - 1.6    | 1.3 [0.8, 1.9]                                                                                 | 1.2 [0.8, 2.1]    | 1.2 [0.9, 2.4]    |

Data are presented as mean (standard deviation) or median [interquartile range].

APTT: Activated partial thromboplastin time; PaO<sub>2</sub>: partial pressure of oxygen; FiO<sub>2</sub>: fraction of inspired oxygen; PaCO<sub>2</sub>: partial pressure of carbon dioxide.

**Supplementary Table 3: Requirement for propofol during remimazolam besylate infusion.**

| <b>Variables</b>    | <b>Infusion dose of remimazolam besylate (mg • kg<sup>-1</sup> • h<sup>-1</sup>)</b> |                           |                           |
|---------------------|--------------------------------------------------------------------------------------|---------------------------|---------------------------|
|                     | 0.100<br>( <i>n</i> = 12)                                                            | 0.125<br>( <i>n</i> = 12) | 0.150<br>( <i>n</i> = 12) |
| Ever                | 6 (50.0)                                                                             | 3 (25.0)                  | 3 (25.0)                  |
| Bolus only          | 2 (16.7)                                                                             | 2 (16.7)                  | 0 (0.0)                   |
| Continuous infusion | 4 (33.3)                                                                             | 1 (8.3)                   | 3 (25.0)                  |

Data are presented as *n* (%).

**Supplementary Table 4: Incidence of adverse events during remimazolam besylate infusion.**

| <b>Adverse event</b> | <b>Total<br/>(<i>n</i> = 36)</b> | <b>Infusion dose of remimazolam besylate (mg • kg<sup>-1</sup> • h<sup>-1</sup>)</b> |                           |                           |
|----------------------|----------------------------------|--------------------------------------------------------------------------------------|---------------------------|---------------------------|
|                      |                                  | 0.100<br>( <i>n</i> = 12)                                                            | 0.125<br>( <i>n</i> = 12) | 0.150<br>( <i>n</i> = 12) |
| Hypotension          | 9                                | 2                                                                                    | 4                         | 3                         |
| Bradycardia          | 1                                | 0                                                                                    | 0                         | 1                         |
| Tachycardia          | 6                                | 4                                                                                    | 0                         | 2                         |
| Nausea               | 1                                | 1                                                                                    | 0                         | 0                         |
| Vomiting             | 1                                | 0                                                                                    | 1                         | 0                         |
